# Supplementary material for: Improving illiterate patients understanding and adherence to discharge medications
Source: PubMed Central journal article supplement — BMJ Qual Improv Rep. 2012 Oct 24;1(1):u496.w167. doi: 10.1136/bmjquality.u496.w167 (PMC4652676; doi:10.1136/bmjquality.u496.w167), 2012-10-24

## Supporting documents

1. Figure 1 : An example of a typical handwritten TTO discharge medication prescription given to patient's at time of discharge.
2. Figure 2 : The redesigned picture-based TTO discharge pro forma. This example is a prescription for paracetamol 1g tds for 14 days in total, diclofan 50mg bd for 7 days, and augmentin 625mg tds for 5 days.
3. Figure 3: The educational poster displayed in the hospital pharmacies to help pharmacists understand the new system
4. Table 2: results of PDSA cycle 3 where one hundred medical inpatients were given the redesigned picture-based pro forma and asked to explain its meaning in terms of drugs to be taken, dosages, time of day to take the medication, and length of course of treatment
5. Bar Chart 1 : Percentage of patients in each subgroup who understood their TTO at point of discharge (WC = with counselling, NC = no counselling)
6. Table 1 : Percentage of patients who could understand their TTO discharge prescription at time of discharge.
7. Bar Chart 2: Comparison of patients understanding of the old handwritten TTO discharge prescription versus the new redesigned picture-based discharge pro forma

1. Figure 1 : An example of a typical handwritten TTO discharge medication prescription given to patient's at time of discharge.

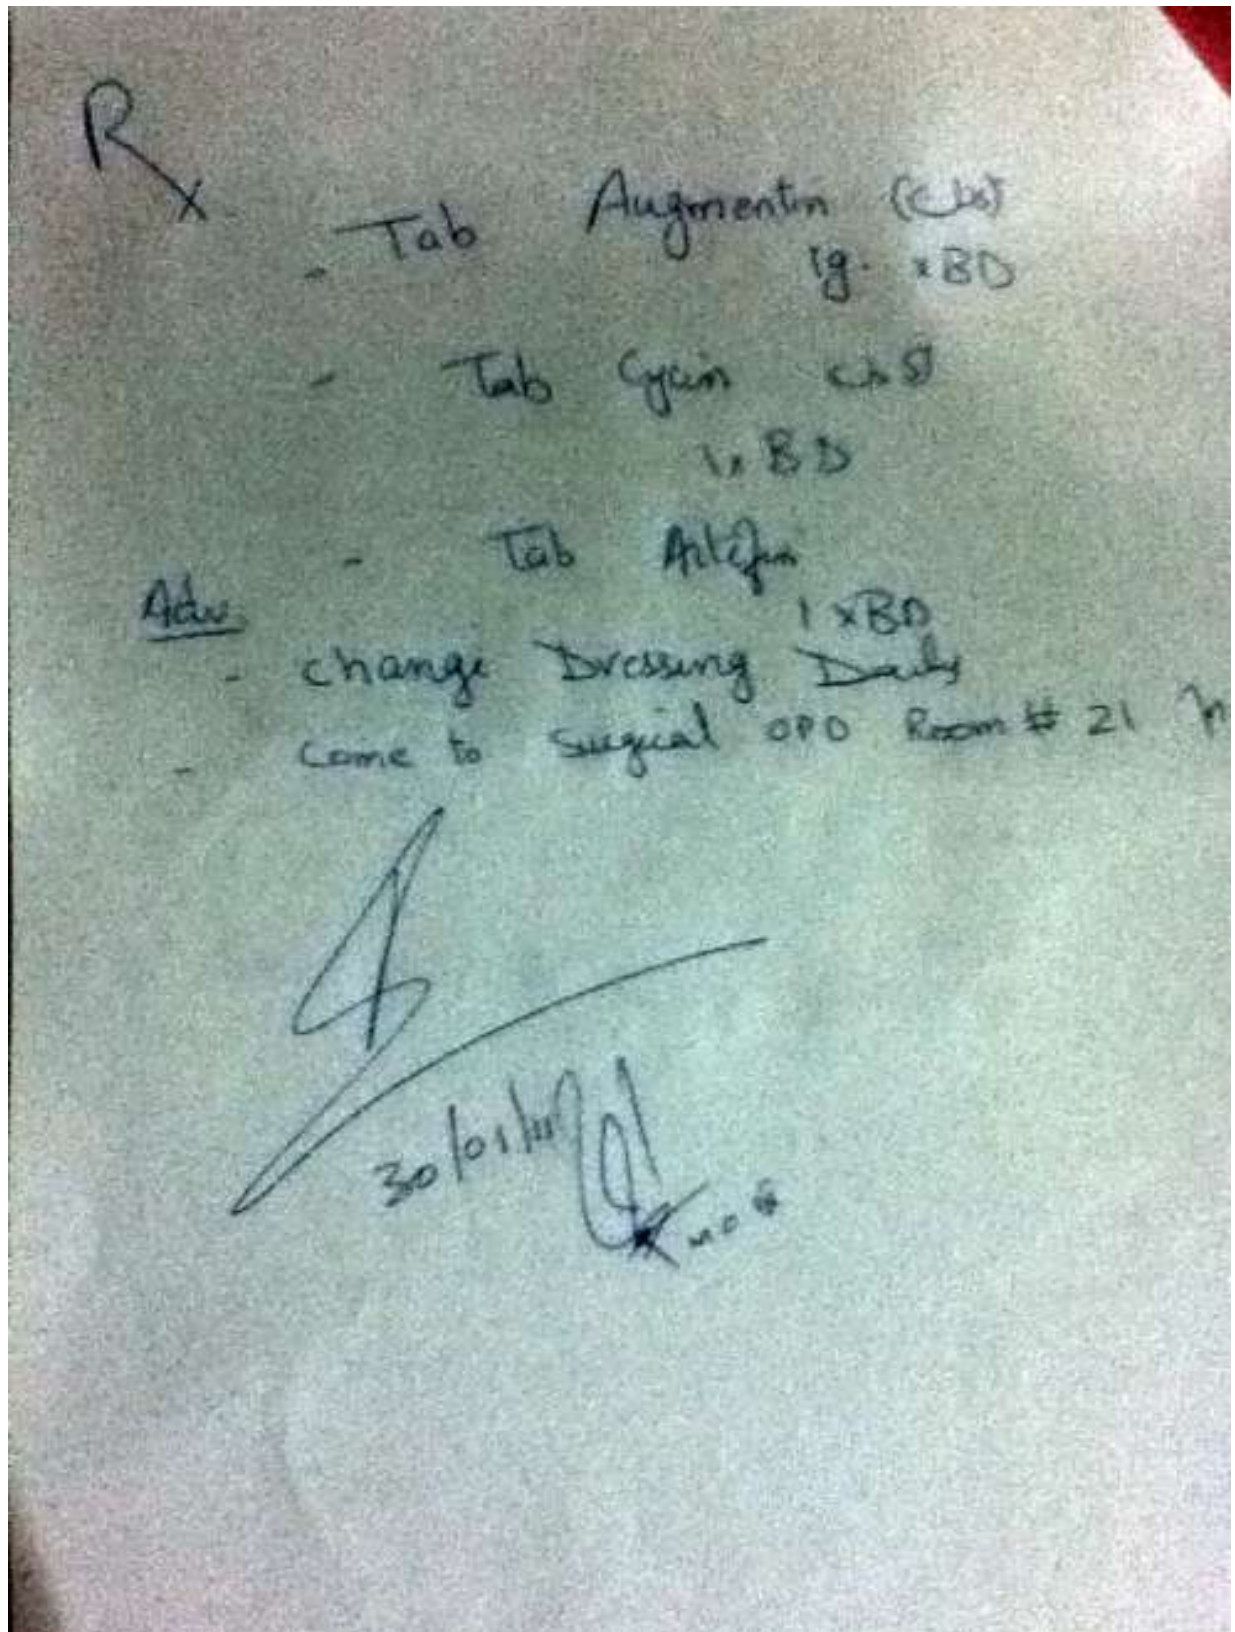

**2. Figure 2 : The redesigned picture-based TTO discharge pro forma.** This example is a prescription for paracetamol 1g tds for 14 days in total, diclofan 50mg bd for 7 days, and augmentin 625mg tds for 5 days.

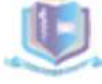

**Medication Prescription Sheet**  
PLEASE WRITE IN BLOCK CAPITALS

ادویات کی یرجی

| I | DRUG<br>دوا         | 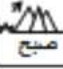<br>صبح | 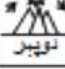<br>دوپہر | 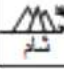<br>شام | 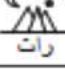<br>رات |  | 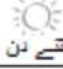<br>کتنے دن |
|---|---------------------|------------------------------------------------------------------------------------------|--------------------------------------------------------------------------------------------|-------------------------------------------------------------------------------------------|--------------------------------------------------------------------------------------------|--|------------------------------------------------------------------------------------------------|
| 1 | Paracetamol 1g tds  | 1                                                                                        | 1                                                                                          | 0                                                                                         | 1                                                                                          |  | 14                                                                                             |
| 2 | Diclofan 50mg bd    | 1                                                                                        | 0                                                                                          | 1                                                                                         | 0                                                                                          |  | 7                                                                                              |
| 3 | Augmentin 625mg tds | 1                                                                                        | 1                                                                                          | 0                                                                                         | 1                                                                                          |  | 5                                                                                              |
| 4 |                     |                                                                                          |                                                                                            |                                                                                           |                                                                                            |  |                                                                                                |
| 5 |                     |                                                                                          |                                                                                            |                                                                                           |                                                                                            |  |                                                                                                |
| 6 |                     |                                                                                          |                                                                                            |                                                                                           |                                                                                            |  |                                                                                                |
| 7 |                     |                                                                                          |                                                                                            |                                                                                           |                                                                                            |  |                                                                                                |
| 8 |                     |                                                                                          |                                                                                            |                                                                                           |                                                                                            |  |                                                                                                |

Additional information    مزید معلومات

**Pharmacy Instructions**  
Please mark medications as per numbers on the left thank you

براہ مہربانی ادویات کے پتے پر وہی نمبر لکھیں جیسا کہ بائیں طرف کالم میں لکھا ہے

3. Figure 3: The educational poster displayed in the hospital pharmacies to help pharmacists understand the new system

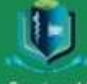

Services Hospital Lahore

## مریضوں کو ادویات دینے کی ہدایات

### Instructions for Dispensing Medications

1. Look at the number of the drug being prescribed. In this example, Paracetamol is number '1'

برائے مہرانی دوائی حاصل کرنے سے پہلے اس کے ساتھ لکھا ہوا نمبر ضرور دیکھیں

| DRUG                | 1 | 2 | 3 | 4 | 5 |
|---------------------|---|---|---|---|---|
| 1 Paracetamol 500mg | 1 | 1 | 1 | 1 | 7 |
| 2 Aspirin 100mg     | 1 | 1 | 1 | 1 | 5 |
| 3 Augmentin 800mg   | 1 | 1 | 1 | 1 | 5 |
| 4                   |   |   |   |   |   |
| 5                   |   |   |   |   |   |
| 6                   |   |   |   |   |   |
| 7                   |   |   |   |   |   |
| 8                   |   |   |   |   |   |

2. Please write CLEARLY the number of the drug on the medication box or strip of tablets being given to the patient

دوائی کا نمبر دوائی کے پتے پر ضرور لکھیں

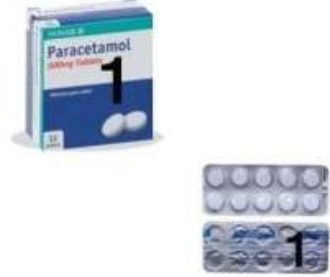

3. Kindly show the patient that the number written on the medication box or strip of tablets is the same as the number on the prescription chart

براہ مہربانی مریض کو دوائی دیتے وقت ضرور بتائیں کہ جو نمبر دوائی پر لکھا گیا ہے وہ وہی ہے جو نسخہ پر دوائی کے لئے مخصوص تھا

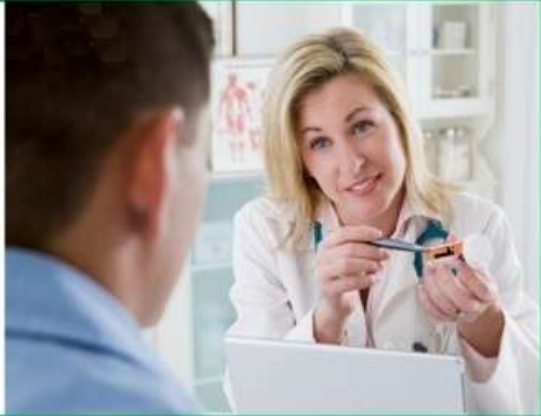

Remember to write on the prescription chart for double the number of tablets at each time of day if you are only dispensing half the strength of the prescribed medication.

اگر دوائی کی مقدار کو تبدیل کریں تو پرچی پر بھی ضرور لکھیں

4. **Table 1: results of PDSA cycle 3 where one hundred medical inpatients were given the redesigned picture-based pro forma and asked to explain its meaning in terms of drugs to be taken, dosages, time of day to take the medication, and length of course of treatment**

| Patient Subgroup                                   | Adherence |     |
|----------------------------------------------------|-----------|-----|
|                                                    | N         | %   |
| Literate, and received counselling                 | 24        | 100 |
| Literate, but not counselled                       | 28        | 100 |
| Illiterate, and received counselling               | 26        | 35  |
| Illiterate, but not counselled                     | 22        | 23  |
|                                                    |           |     |
| Total patient population, and received counselling | *         | 69  |
| Total patient population, but not counselled       | *         | 63  |

5. Bar chart 1 :

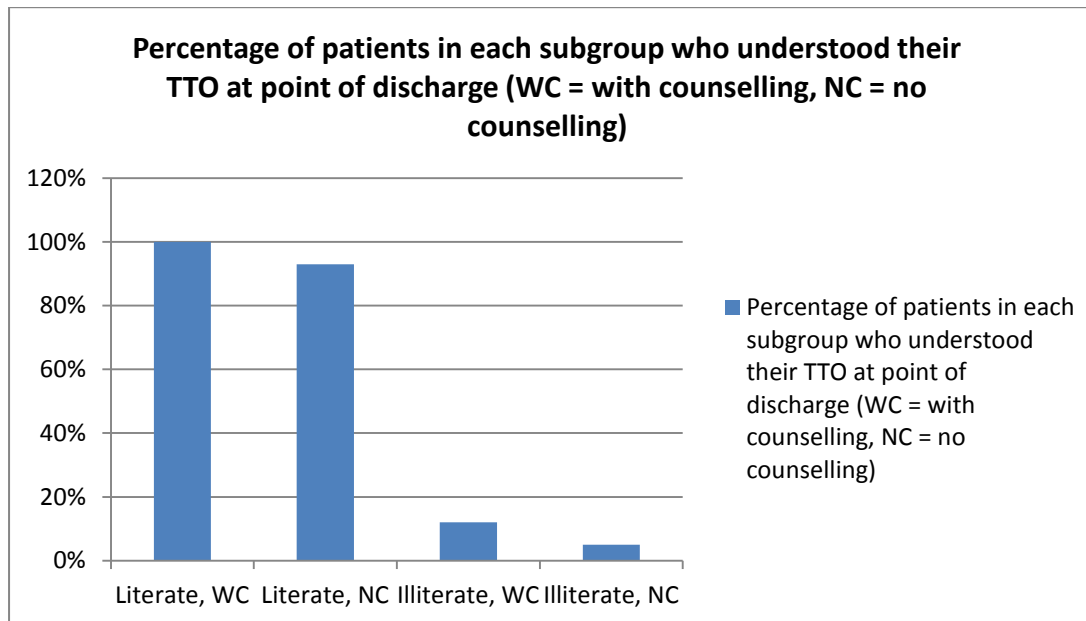

6. Table 1 : Percentage of patients who could understand their TTO discharge prescription at time of discharge. N = number of patients in each subgroup (100 patients in total)

| Patient Subgroup                                       | Adherence |     |
|--------------------------------------------------------|-----------|-----|
|                                                        | N         | %   |
| Literate, and received counselling                     | 24        | 100 |
| Literate, but not counselled                           | 28        | 93  |
| Illiterate, and received counselling                   | 26        | 12  |
| Illiterate, but not counselled                         | 22        | 5   |
|                                                        |           |     |
| Total patient population, and received counselling     | *         | 58  |
| Total patient population, and not received counselling | *         | 51  |

7. Bar Chart 2: Comparison of patients understanding of the old handwritten TTO discharge prescription versus the new redesigned picture-based discharge pro forma

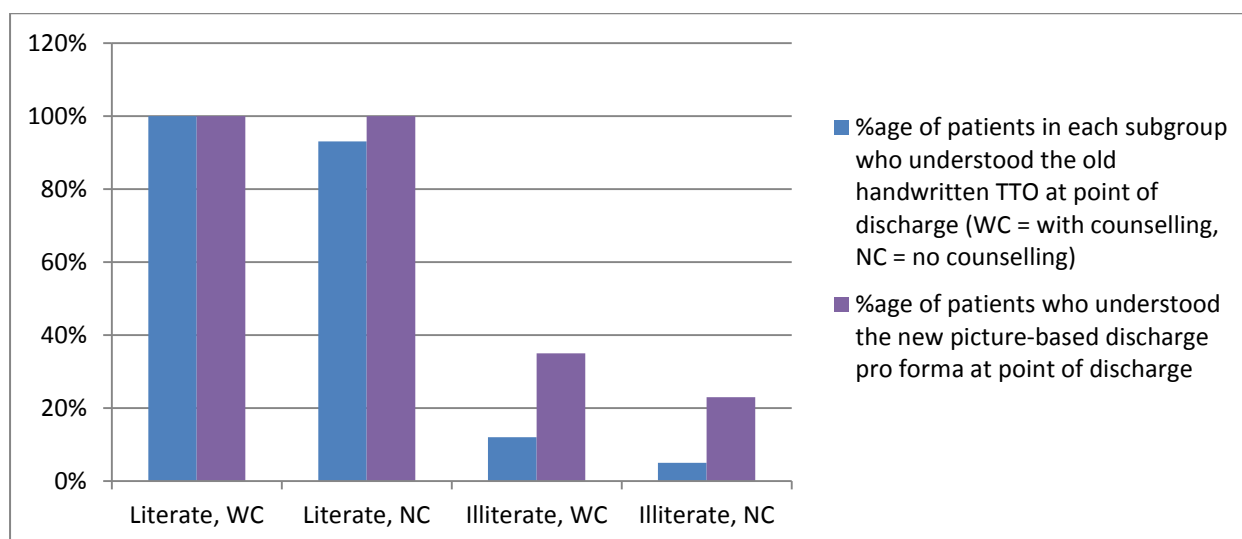

Supplement: bmjqir.u496.w167-s4.pdf [file bmjqir.u496.w167-s4.pdf]
