# Supplementary material for: Improving illiterate patients understanding and adherence to discharge medications
Source: PubMed Central journal article supplement — BMJ Qual Improv Rep. 2012 Oct 24;1(1):u496.w167. doi: 10.1136/bmjquality.u496.w167 (PMC4652676; doi:10.1136/bmjquality.u496.w167), 2012-10-24

Figure 1 : An example of a typical handwritten TTO discharge medication prescription given to patient's at time of discharge.

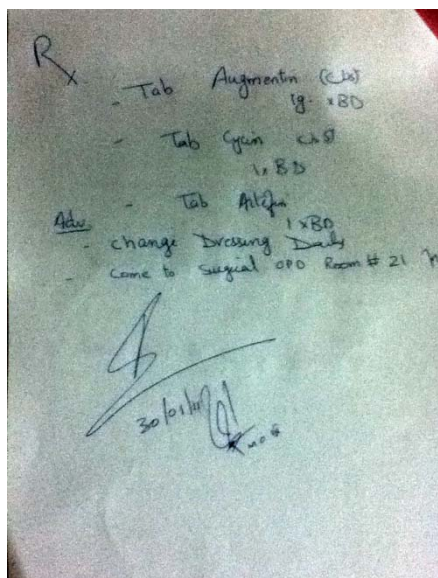

Table 1 : Percentage of patients who could understand their TTO discharge prescription at time of discharge. N = number of patients in each subgroup (100 patients in total)

| Patient Subgroup                                       | Adherence |     |
|--------------------------------------------------------|-----------|-----|
|                                                        | N         | %   |
| Literate, and received counselling                     | 24        | 100 |
| Literate, but not counselled                           | 28        | 93  |
| Illiterate, and received counselling                   | 26        | 12  |
| Illiterate, but not counselled                         | 22        | 5   |
|                                                        |           |     |
| Total patient population, and received counselling     | *         | 58  |
| Total patient population, and not received counselling | *         | 51  |

Bar chart 1 :

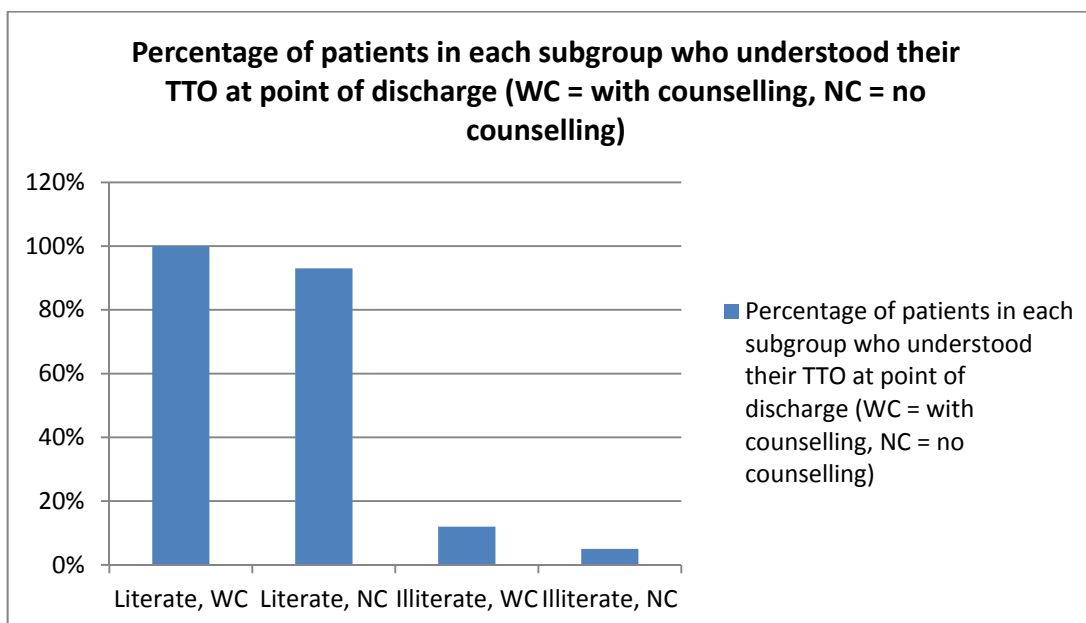

Supplement: bmjqir.u496.w167-s1.pdf [file bmjqir.u496.w167-s1.pdf]
