# Supplementary material for: Improving illiterate patients understanding and adherence to discharge medications
Source: PubMed Central journal article supplement — BMJ Qual Improv Rep. 2012 Oct 24;1(1):u496.w167. doi: 10.1136/bmjquality.u496.w167 (PMC4652676; doi:10.1136/bmjquality.u496.w167), 2012-10-24

# Process Flow Template

Please use the tools on the right to develop your process flow

## Example Flow: A patient attending A&E (non-resus)

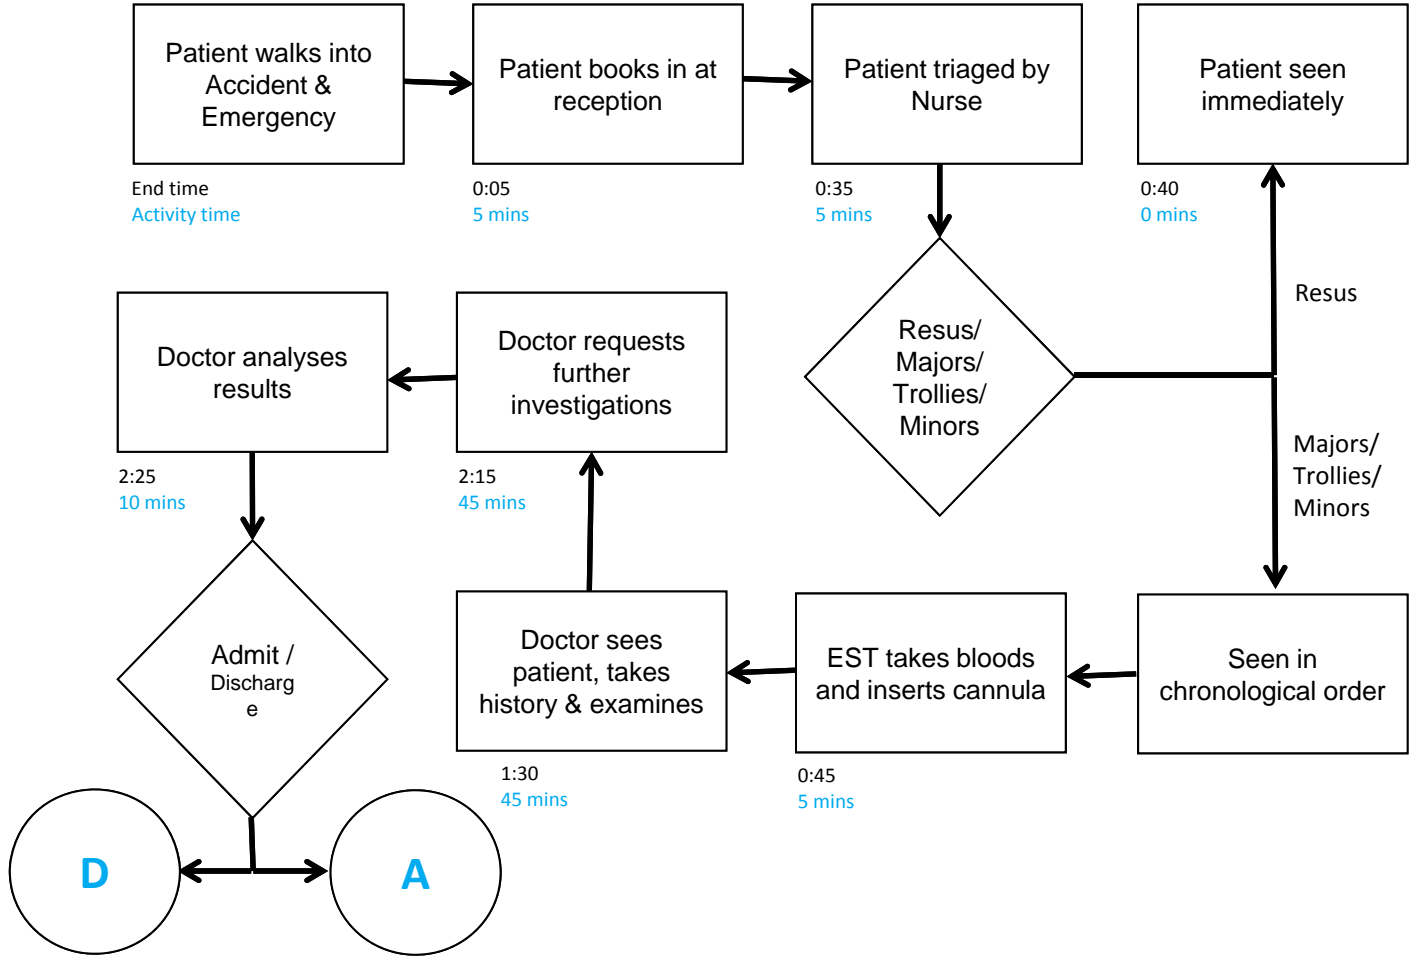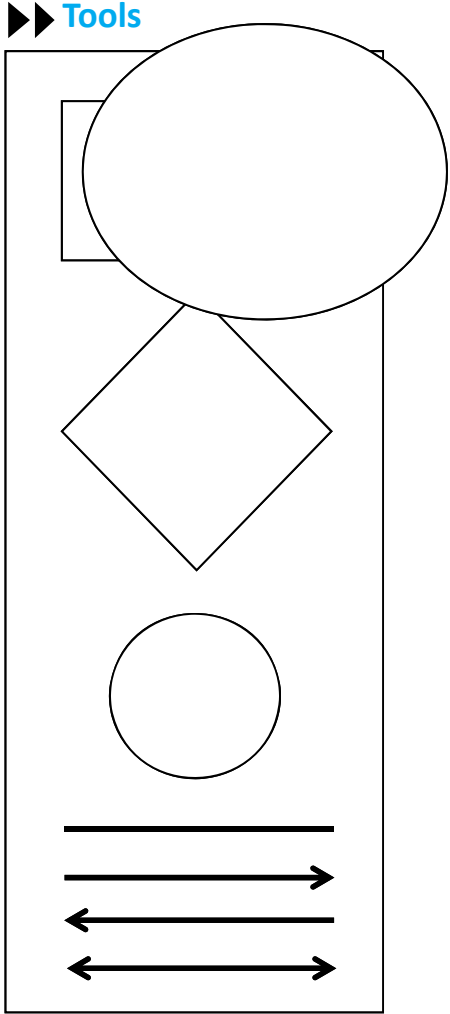

# An illiterate patient leaving Services hospital with their TTO discharge medication

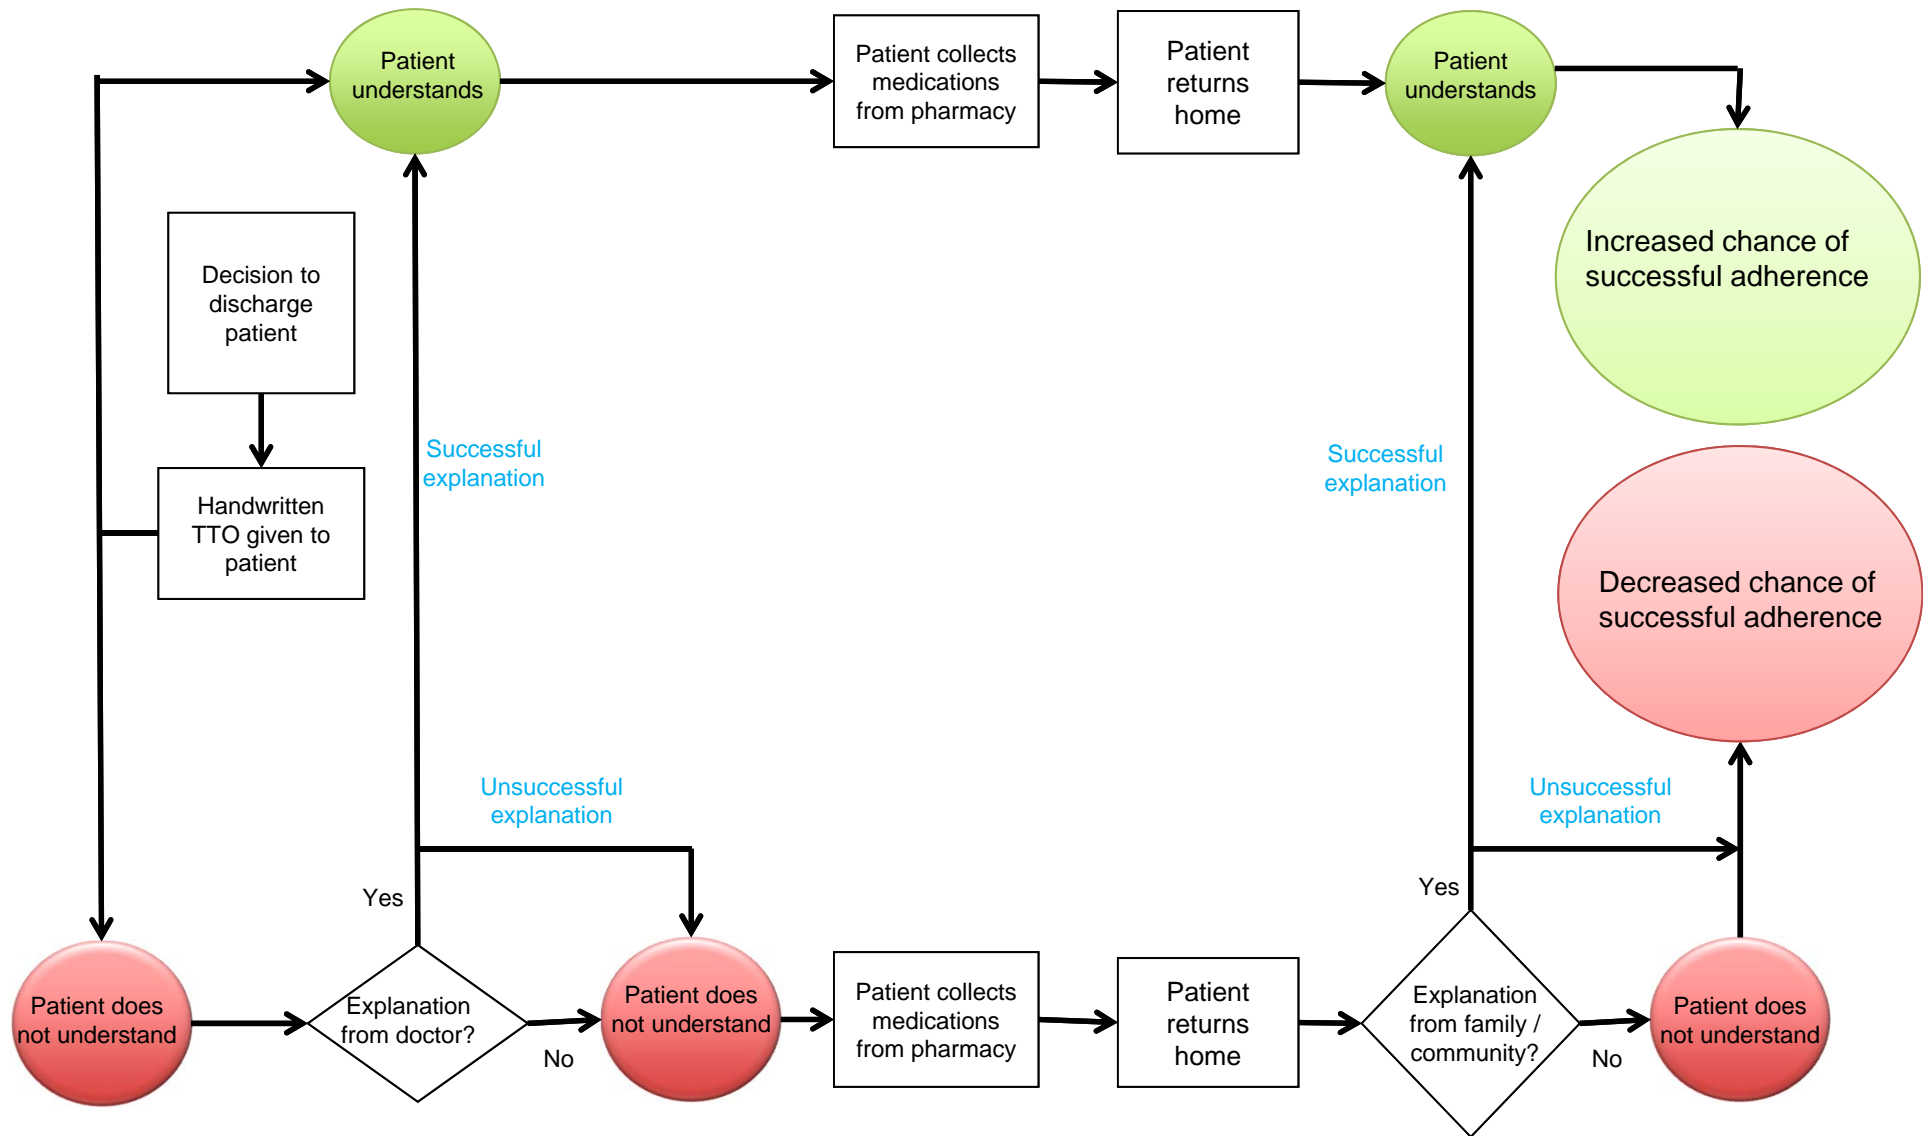

Supplement: bmjqir.u496.w167-s2.pdf [file bmjqir.u496.w167-s2.pdf]
